# Supplementary material for: Accumulation of Anthocyanins in Detached Leaves of Kalanchoë blossfeldiana: Relevance to the Effect of Methyl Jasmonate on This Process
Source: MDPI journal article supplement (doi:10.3390/ijms24010626), 2022-12-30
Supplement: s1 [file s1]

## Supplementary materials

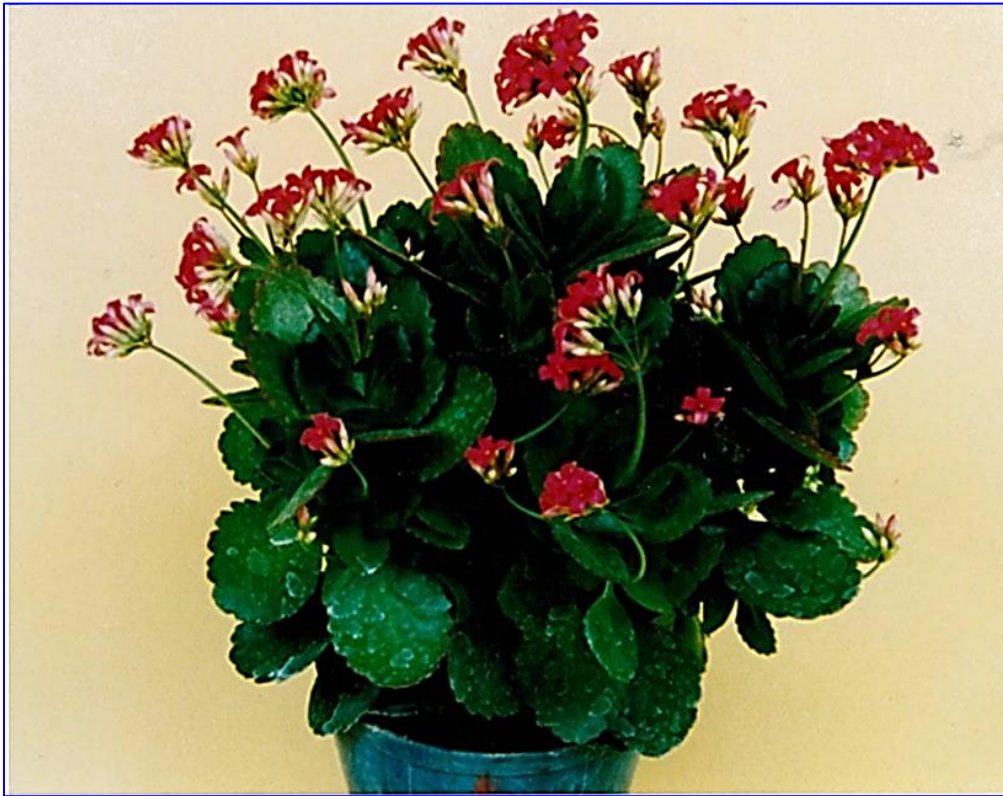

**Figure S1.** Flowering *Kalanchoë blossfeldiana* plant

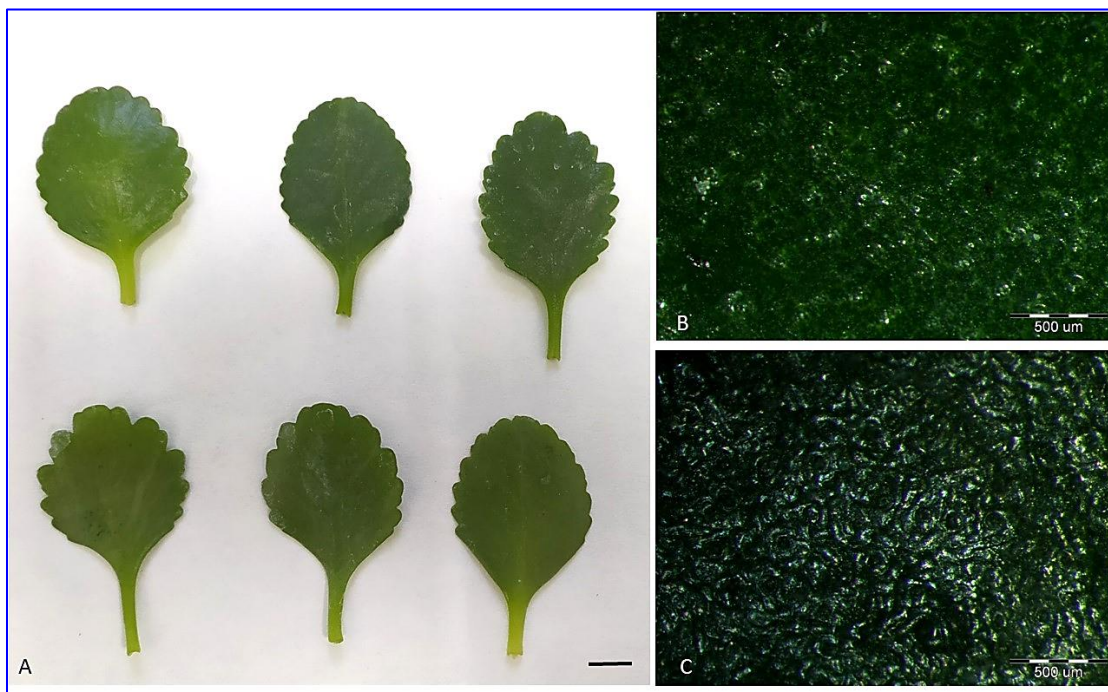

**Figure S2.** Leaves detached from *K. blossfeldiana* plant at the beginning of the experiment. (A) Top row – adaxial surface of the leaves. Bottom row – abaxial surface of the leaves. Bar represent 10 mm. (B) Adaxial side of the leaf. (C). Abaxial side of the leaf.

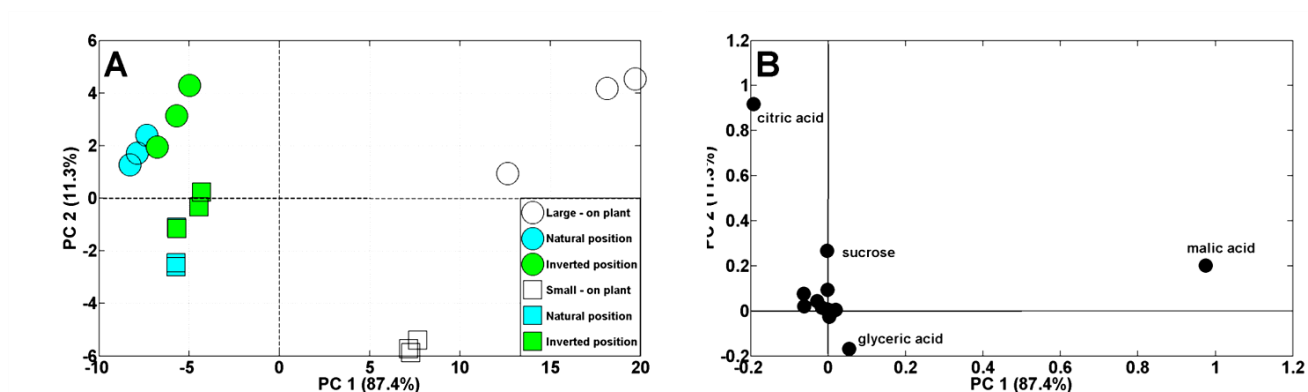

**Figure S3.** PCA of polar metabolite profiles in small/younger (circles) and large/older (squares) leaves before (empty symbols) and after 4 days of holding under natural light conditions in normal (blue symbols) and inverted (green symbols) position against the light (A). The major discriminating metabolites are shown on B.

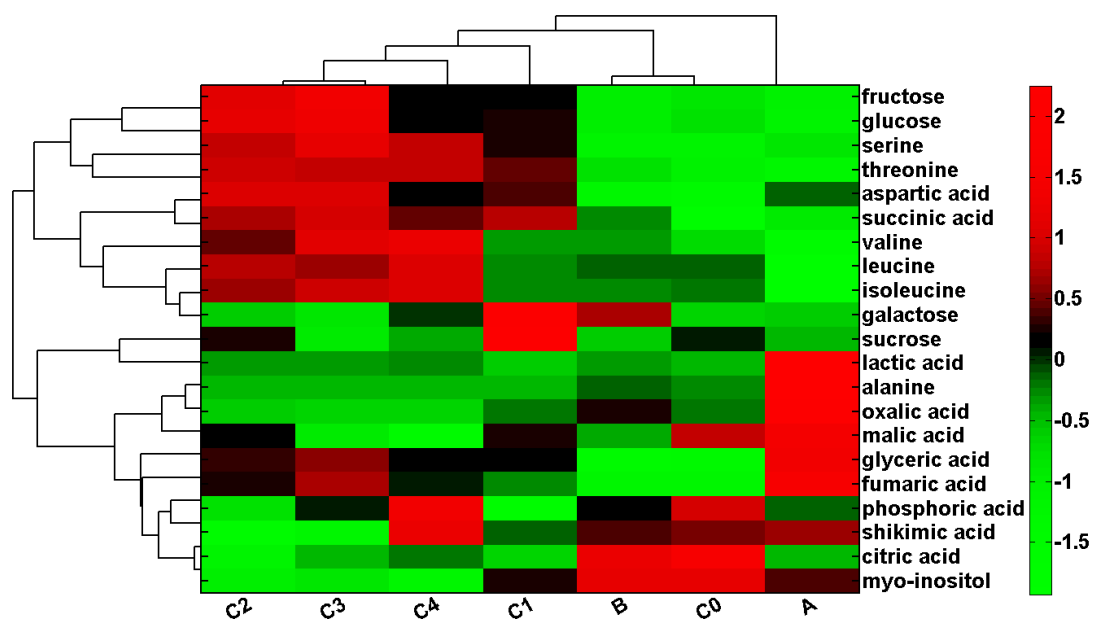

**Figure S4.** HCA of leaves samples *K. blossfeldiana* on plant (A), and after 4 days of storage of detached leaves kept in an inverted position against the light (B) and treated with lanolin paste containing JA-Me at concentrations of 0, 1.0, 0.5, 0.25 and 0.1% (C0, C1, C2, C3 and C4, respectively)

**Table S1.** Amino acid content (mg/g DW) in *K. blossfeldiana* leaves on the plant, and in leaves detached and kept for 4 days in the natural position or kept for 4 days in the inverted position. Mean results in rows  $\pm$  standard deviation followed by the same letter were not significantly different ( $p < 0.05$ ) according to Tukey's test.

| Amino acid | On plant          | Normal position   | Inverted position | On plant          | Normal position      | Inverted position    |
|------------|-------------------|-------------------|-------------------|-------------------|----------------------|----------------------|
|            |                   | Large leaves      |                   |                   | Small leaves         |                      |
| Valine     | $0.02 \pm 0.01^a$ | $0.05 \pm 0.01^a$ | $0.07 \pm 0.02^a$ | $0.01 \pm 0.01^a$ | $0.02 \pm 0.01^a$    | $0.03 \pm 0.01^a$    |
| Alanine    | $0.03 \pm 0.03^a$ | Nd                | Nd                | $0.06 \pm 0.01^a$ | $0.02 \pm 0.01^a$    | $0.03 \pm 0.01^a$    |
| Leucine    | Nd                | $0.09 \pm 0.01^a$ | $0.08 \pm 0.01^a$ | Nd                | $0.02 \pm 0.01^b$    | $0.02 \pm 0.01^b$    |
| Isoleucine | $0.01 \pm 0.01^b$ | $0.10 \pm 0.02^a$ | $0.11 \pm 0.02^a$ | $0.01 \pm 0.01^b$ | $0.05 \pm 0.02^{ab}$ | $0.06 \pm 0.01^{ab}$ |
| Serine     | $0.02 \pm 0.01^a$ | $0.02 \pm 0.01^a$ | $0.02 \pm 0.01^a$ | $0.01 \pm 0.01^a$ | $0.02 \pm 0.01^a$    | $0.02 \pm 0.01^a$    |

**Table S2.** Effect of methyl jasmonate (JA-Me) applied in lanolin paste on the middle part of the detached leaves of *K. blossfeldiana* on amino acids content. A - leaves on the plant; B -leaves kept in the inverted position for 4 days; C0 - leaves kept in the inverted position and treated with pure lanolin; C1, C2,C3, C4 - leaves stored in the inverted position and treated with 1% JA-Me, 0.5% JA-Me, 0.25% JA-Me or 0.1% JA-Me in lanolin paste, respectively. Mean results in rows  $\pm$  standard deviation followed by the same letter were not significantly different ( $p < 0.05$ ) according to Tukey's test.

| Amino acid    | A                 | B                 | C0                | C1                | C2                | C3                | C4                |
|---------------|-------------------|-------------------|-------------------|-------------------|-------------------|-------------------|-------------------|
| Valine        | $0.01 \pm 0.01^a$ | $0.03 \pm 0.01^a$ | $0.02 \pm 0.01^a$ | $0.03 \pm 0.01^a$ | $0.07 \pm 0.02^a$ | $0.04 \pm 0.01^a$ | $0.05 \pm 0.01^a$ |
| Alanine       | $0.06 \pm 0.01^a$ |
| Leucine       | Nd                | $0.02 \pm 0.01^a$ | $0.02 \pm 0.01^a$ | $0.02 \pm 0.01^a$ | $0.06 \pm 0.02^a$ | $0.03 \pm 0.01^a$ | $0.03 \pm 0.01^a$ |
| Isoleucine    | Nd                | $0.04 \pm 0.01^a$ | $0.04 \pm 0.01^a$ | $0.04 \pm 0.01^a$ | $0.11 \pm 0.04^a$ | $0.06 \pm 0.01^a$ | $0.07 \pm 0.01^a$ |
| Serine        | $0.02 \pm 0.01^a$ | $0.01 \pm 0.01^a$ | $0.01 \pm 0.01^a$ | $0.04 \pm 0.01^a$ | $0.04 \pm 0.01^a$ | $0.07 \pm 0.01^a$ | $0.06 \pm 0.01^a$ |
| Threonine     | $0.02 \pm 0.01^a$ | $0.03 \pm 0.01^a$ | $0.03 \pm 0.01^a$ | $0.07 \pm 0.01^a$ | $0.08 \pm 0.02^a$ | $0.08 \pm 0.02^a$ | $0.08 \pm 0.02^a$ |
| Aspartic acid | $0.03 \pm 0.01^a$ | $0.01 \pm 0.01^a$ | $0.01 \pm 0.01^a$ | $0.04 \pm 0.01^a$ | $0.02 \pm 0.01^a$ | $0.05 \pm 0.01^a$ | $0.03 \pm 0.01^a$ |

**Table S3.** Spearman's correlation coefficients between malic acid and monosaccharide content and their total content in leaves of *K. blossfeldiana* on the plant and detached and kept for 4 days in the light in the inverted and normal (natural) position

|                                      | Pearson's correlation coefficient | significance level |
|--------------------------------------|-----------------------------------|--------------------|
| Fructose vs. malic acid              | -0.809                            | <0.001             |
| Glucose vs. malic acid               | -0.807                            | <0.001             |
| Galactose vs. malic acid             | -0.744                            | 0.001              |
| Total monosaccharides vs. malic acid | -0.818                            | <0.001             |
